# Supplementary material
Source: PubMed Central journal article supplement (PMC4716690)

The American Journal of Human Genetics

Supplemental Data

**Invariant TAD Boundaries Constrain Cell-Type-Specific  
Looping Interactions between Promoters  
and Distal Elements around the *CFTR* Locus**

Emily M. Smith, Bryan R. Lajoie, Gaurav Jain, and Job Dekker

**Table S1: 5C probe set.** This table contains all the probes used in the 5C experiment: their name, sequence, and genomic location.

**Table S2: Mapping Statistics.** This table contains all mapping statistics for the raw data of our 10 5C libraries.

**Table S3: 5C library read depth.** This table summarizes the 5C read depth for each replicate, indicating the number of reads in the raw data, cis-purged data, singleton- removed data, and final coverage corrected data.

|            | Raw Data      |            | <i>cis</i> -purged Data |            | Singleton-removed Data |            | Coverage-corrected Data |            |
|------------|---------------|------------|-------------------------|------------|------------------------|------------|-------------------------|------------|
|            | #interactions | #reads     | #interactions           | #reads     | #interactions          | #reads     | #interactions           | #reads     |
| Caco2-R1   | 50,986        | 12,930,158 | 24,492                  | 9,240,611  | 24,449                 | 7,265,532  | 20,351                  | 7,354,017  |
| Caco2-R2   | 50,970        | 12,724,492 | 27,090                  | 9,783,411  | 27,046                 | 9,453,039  | 22,278                  | 8,248,685  |
| Calu3-R1   | 66,029        | 18,308,618 | 36,812                  | 12,073,332 | 36,768                 | 11,970,277 | 32,886                  | 8,222,536  |
| Calu3-R2   | 148,785       | 25,380,481 | 39,883                  | 15,507,757 | 39,908                 | 15,378,124 | 36,733                  | 8,522,545  |
| Capan1-R1  | 126,462       | 18,101,240 | 38,046                  | 6,041,896  | 38,002                 | 5,760,920  | 35,337                  | 8,853,211  |
| Capan1-R2  | 161,499       | 27,547,883 | 39,308                  | 8,722,529  | 39,264                 | 8,380,681  | 36,799                  | 8,897,244  |
| GM12878-R1 | 88,198        | 24,408,480 | 37,880                  | 9,907,568  | 37,836                 | 9,687,772  | 34,869                  | 10,734,618 |
| GM12878-R2 | 190,199       | 28,011,778 | 40,190                  | 15,253,503 | 40,146                 | 14,800,666 | 39,392                  | 9,711,216  |
| HepG2-R1   | 161,365       | 31,681,378 | 39,568                  | 24,630,673 | 39,524                 | 24,508,802 | 35,515                  | 11,181,660 |
| HepG2-R2   | 147,911       | 26,426,516 | 39,909                  | 16,945,637 | 39,865                 | 16,718,446 | 35,701                  | 9,771,604  |



**Table S5: Probes Removed in Probe Filtering Step.** This table shows the 34 probes removed from all datasets after our probe filtering step.

Trim Amount: 0.85

| Flagged Probe         | #datasets in which this probe is flagged |
|-----------------------|------------------------------------------|
| 5C_2410_EMS03_FOR_102 | 10                                       |
| 5C_2410_EMS03_FOR_140 | 10                                       |
| 5C_2410_EMS03_FOR_349 | 10                                       |
| 5C_2410_EMS03_FOR_429 | 10                                       |
| 5C_2410_EMS03_FOR_773 | 10                                       |
| 5C_2410_EMS03_FOR_165 | 10                                       |
| 5C_2410_EMS03_FOR_2   | 10                                       |
| 5C_2410_EMS03_REV_10  | 9                                        |
| 5C_2410_EMS03_FOR_75  | 9                                        |
| 5C_2410_EMS03_FOR_74  | 9                                        |
| 5C_2410_EMS03_REV_13  | 8                                        |
| 5C_2410_EMS03_FOR_8   | 8                                        |
| 5C_2410_EMS03_FOR_51  | 8                                        |
| 5C_2410_EMS03_FOR_54  | 7                                        |
| 5C_2410_EMS03_FOR_197 | 7                                        |
| 5C_2410_EMS03_FOR_762 | 7                                        |
| 5C_2410_EMS03_REV_111 | 7                                        |
| 5C_2410_EMS03_FOR_228 | 7                                        |
| 5C_2410_EMS03_FOR_389 | 7                                        |
| 5C_2410_EMS03_FOR_350 | 7                                        |
| 5C_2410_EMS03_REV_523 | 6                                        |
| 5C_2410_EMS03_FOR_407 | 6                                        |
| 5C_2410_EMS03_FOR_1   | 6                                        |
| 5C_2410_EMS03_FOR_57  | 5                                        |
| 5C_2410_EMS03_FOR_129 | 5                                        |
| 5C_2410_EMS03_FOR_677 | 5                                        |
| 5C_2410_EMS03_FOR_117 | 5                                        |
| 5C_2410_EMS03_FOR_248 | 4                                        |
| 5C_2410_EMS03_FOR_246 | 4                                        |
| 5C_2410_EMS03_FOR_864 | 4                                        |
| 5C_2410_EMS03_FOR_283 | 4                                        |
| 5C_2410_EMS03_FOR_607 | 4                                        |
| 5C_2410_EMS03_FOR_658 | 4                                        |
| 5C_2410_EMS03_FOR_298 | 4                                        |

**Table S6: Individual Interactions Removed in Singleton Removal Step.** This table lists the 44 individual interactions removed in the singleton removal step.

| z-score 12                                  | #datasets in which this interaction is flagged |
|---------------------------------------------|------------------------------------------------|
| Probe-Probe interaction                     |                                                |
| 5C_2410_EMS03_FOR_124_5C_2410_EMS03_REV_17  | 10                                             |
| 5C_2410_EMS03_FOR_128_5C_2410_EMS03_REV_17  | 10                                             |
| 5C_2410_EMS03_FOR_464_5C_2410_EMS03_REV_405 | 10                                             |
| 5C_2410_EMS03_FOR_126_5C_2410_EMS03_REV_17  | 9                                              |
| 5C_2410_EMS03_FOR_128_5C_2410_EMS03_REV_203 | 9                                              |
| 5C_2410_EMS03_FOR_21_5C_2410_EMS03_REV_203  | 9                                              |
| 5C_2410_EMS03_FOR_339_5C_2410_EMS03_REV_898 | 9                                              |
| 5C_2410_EMS03_FOR_605_5C_2410_EMS03_REV_777 | 9                                              |
| 5C_2410_EMS03_FOR_7_5C_2410_EMS03_REV_405   | 9                                              |
| 5C_2410_EMS03_FOR_817_5C_2410_EMS03_REV_405 | 9                                              |
| 5C_2410_EMS03_FOR_90_5C_2410_EMS03_REV_613  | 9                                              |
| 5C_2410_EMS03_FOR_93_5C_2410_EMS03_REV_405  | 9                                              |
| 5C_2410_EMS03_FOR_467_5C_2410_EMS03_REV_719 | 8                                              |
| 5C_2410_EMS03_FOR_548_5C_2410_EMS03_REV_405 | 8                                              |
| 5C_2410_EMS03_FOR_579_5C_2410_EMS03_REV_72  | 8                                              |
| 5C_2410_EMS03_FOR_125_5C_2410_EMS03_REV_17  | 7                                              |
| 5C_2410_EMS03_FOR_19_5C_2410_EMS03_REV_203  | 7                                              |
| 5C_2410_EMS03_FOR_214_5C_2410_EMS03_REV_761 | 7                                              |
| 5C_2410_EMS03_FOR_71_5C_2410_EMS03_REV_761  | 7                                              |
| 5C_2410_EMS03_FOR_87_5C_2410_EMS03_REV_782  | 7                                              |
| 5C_2410_EMS03_FOR_105_5C_2410_EMS03_REV_405 | 6                                              |
| 5C_2410_EMS03_FOR_208_5C_2410_EMS03_REV_711 | 6                                              |
| 5C_2410_EMS03_FOR_503_5C_2410_EMS03_REV_420 | 6                                              |
| 5C_2410_EMS03_FOR_125_5C_2410_EMS03_REV_665 | 5                                              |
| 5C_2410_EMS03_FOR_132_5C_2410_EMS03_REV_17  | 5                                              |
| 5C_2410_EMS03_FOR_139_5C_2410_EMS03_REV_405 | 5                                              |
| 5C_2410_EMS03_FOR_154_5C_2410_EMS03_REV_405 | 5                                              |
| 5C_2410_EMS03_FOR_641_5C_2410_EMS03_REV_420 | 5                                              |
| 5C_2410_EMS03_FOR_68_5C_2410_EMS03_REV_594  | 5                                              |
| 5C_2410_EMS03_FOR_98_5C_2410_EMS03_REV_405  | 5                                              |
| 5C_2410_EMS03_FOR_12_5C_2410_EMS03_REV_203  | 4                                              |
| 5C_2410_EMS03_FOR_136_5C_2410_EMS03_REV_405 | 4                                              |
| 5C_2410_EMS03_FOR_237_5C_2410_EMS03_REV_665 | 4                                              |
| 5C_2410_EMS03_FOR_394_5C_2410_EMS03_REV_405 | 4                                              |
| 5C_2410_EMS03_FOR_5_5C_2410_EMS03_REV_808   | 4                                              |
| 5C_2410_EMS03_FOR_502_5C_2410_EMS03_REV_420 | 4                                              |
| 5C_2410_EMS03_FOR_503_5C_2410_EMS03_REV_421 | 4                                              |
| 5C_2410_EMS03_FOR_597_5C_2410_EMS03_REV_666 | 4                                              |

|                                             |   |
|---------------------------------------------|---|
| 5C_2410_EMS03_FOR_626_5C_2410_EMS03_REV_420 | 4 |
| 5C_2410_EMS03_FOR_63_5C_2410_EMS03_REV_405  | 4 |
| 5C_2410_EMS03_FOR_641_5C_2410_EMS03_REV_421 | 4 |
| 5C_2410_EMS03_FOR_672_5C_2410_EMS03_REV_203 | 4 |
| 5C_2410_EMS03_FOR_751_5C_2410_EMS03_REV_665 | 4 |
| 5C_2410_EMS03_FOR_883_5C_2410_EMS03_REV_405 | 4 |



**Table S7: Significant Interactions.** This table lists all significant intra-TAD and inter - TAD interactions in the 5 cell types.

**Table S8: RT-PCR Primers.** Primers used in our qPCR experiment testing gene expression in the 5C region.

Genes in 5C Region - qPCR primers

| <u>Primer Name</u>                                                             | <u>Primer Sequence</u>  | <u>Exon #</u> | <u>Genome Coordinates (hg18)</u> |
|--------------------------------------------------------------------------------|-------------------------|---------------|----------------------------------|
| <b><u>TES:</u> <i>testin isoform 1</i></b>                                     |                         |               |                                  |
| TES_F_A                                                                        | GCCCCTTGTTTAAAATGCAA    | 2             | 115661854-115661873              |
| TES_R_A                                                                        | TGCTCAAGAGGACATCATGC    | 3             | 115676346-115676365              |
| <b><u>CAV2:</u> <i>caveolin 2 isoform a and b</i></b>                          |                         |               |                                  |
| CAV2_F_A                                                                       | GGCTCAACTCGCATCTCAAG    | 1             | 115927202-115927221              |
| CAV2_R_A                                                                       | CAGGAACACCGTCAGGAACT    | 2             | 115927656-115927675              |
| <b><u>CAV1:</u> <i>caveolin 1</i></b>                                          |                         |               |                                  |
| CAV1_F_A                                                                       | GAGCTGAGCGAGAAGCAAGT    | 2             | 115953887-115953906              |
| CAV1_R_A                                                                       | CAAATGCCGTCAAACTGTG     | 3             | 115986275-115986294              |
| <b><u>MET:</u> <i>met proto-oncogene isoform a precursor</i></b>               |                         |               |                                  |
| MET_F_B                                                                        | CCAATGACCTGCTGAAATTG    | 11            | 116197041-116197060              |
| MET_R_B                                                                        | CTTTTCCAAGGACGGTTGAA    | 12            | 116198805-116198824              |
| <b><u>CAPZA2:</u> <i>capping protein (actin filament) muscle Z-line</i></b>    |                         |               |                                  |
| CAPZA2_F_A                                                                     | GAAGGAGGCAACTGATCCAA    | 5             | 116331553-116331572              |
| CAPZA2_R_A                                                                     | GCTTGGAAGTGTGGCTTTTC    | 6             | 116333601-116333620              |
| <b><u>ST7:</u> <i>suppression of tumorigenicity 7 isoform b</i></b>            |                         |               |                                  |
| ST7_F_A                                                                        | TTCCAGTAACGGGGACTCAG    | 3             | 116546967-116546986              |
| ST7_R_A                                                                        | TGGATTTCCGCATACTTTGC    | 4             | 116557086-116557105              |
| <b><u>WNT2:</u> <i>wingless-type MMTV integration site family</i></b>          |                         |               |                                  |
| WNT2_F_B                                                                       | GTGGATGCAAAGGAAAGGAA    | 3             | 116742416-116742435              |
| WNT2_R_B                                                                       | AGCCAGCATGTCCTGAGAGT    | 4             | 116725090-116725109              |
| <b><u>ASZ1:</u> <i>ankyrin repeat, SAM and basic leucine zipper</i></b>        |                         |               |                                  |
| ASZ1_F_B                                                                       | CACGTCAGGGTCATAAA       | 6             | 116812115-116812137              |
| ASZ1_R_B                                                                       | GCTGTTGAAGTTTTCTTCCA    | 7             | 116810346-116810366              |
| <b><u>CFTR:</u> <i>cystic fibrosis transmembrane conductance regulator</i></b> |                         |               |                                  |
| CFTR2-3F                                                                       | CCCTTCTGTTGATTCTGCTG    | 2             | 116931609-116931628              |
| CFTR2-3R                                                                       | AAGGGCATTAAATGAGTTTAGGA | 3             | 116936357-116936378              |
| <b><u>CTTNBP2:</u> <i>cortactin binding protein 2</i></b>                      |                         |               |                                  |
| CTTNBP2_F_C                                                                    | AAAATGGCTTCACACCCTTG    | 6             | 117210181-117210200              |
| CTTNBP2_R_C                                                                    | TGTCTGTCCATCAGCAG       | 7             | 117207818-117207837              |
| <b><u>LSM8:</u> <i>U6 snRNA-associated Sm-like protein LSM8</i></b>            |                         |               |                                  |
| LSM8_F_A                                                                       | CAGCTCTTCACAGGGGGTAG    | 3             | 117615633-117615652              |
| LSM8_R_A                                                                       | CTGCTCGAATATTCGCCAAA    | 4             | 117619247-117619000              |
| <b><u>ANKRD7:</u> <i>ankyrin repeat domain 7 isoform b</i></b>                 |                         |               |                                  |
| ANKRD7_F_A                                                                     | ACTTTTGCACCTAGCCTGTG    | 2             | 117661724-117661743              |

|                                                                             |                      |   |                     |
|-----------------------------------------------------------------------------|----------------------|---|---------------------|
| ANKRD7_R_A                                                                  | ATCTGGGTCTGCACCAAAGT | 3 | 117662034-117662053 |
| <b>HPRT1:</b> <i>Chromosome X: hypoxanthine phosphoribosyltransferase 1</i> |                      |   |                     |
| HPRT2-3F                                                                    | TGAGGATTTGGAAAGGGTGT | 2 | 133435114-133435133 |
| HPRT2-3R                                                                    | TAATCCAGCAGGTCAGCAA  | 3 | 133436965-133436984 |

**Figures S1-S10: Correction pipeline for each replicate.** A) Raw data. B) Data after cis-purge. Grey stripes represent primers that were removed. C) Data after singleton removal. Grey stripes are the primers removed in the previous step, grey pixels are the individual reactions that were removed in this step. D) Final coverage corrected data. Grey lines have been removed and are now represented in white. E) Binned raw data (100kb, 10kb step). F) Binned coverage corrected data (100kb, 10kb step).

Caco2 R1

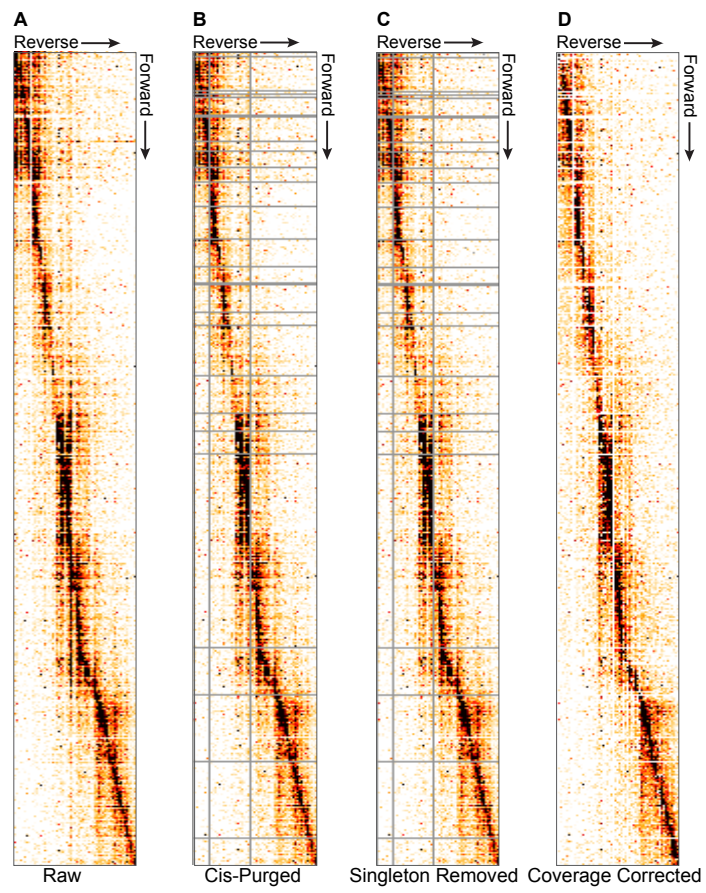

Figure S1

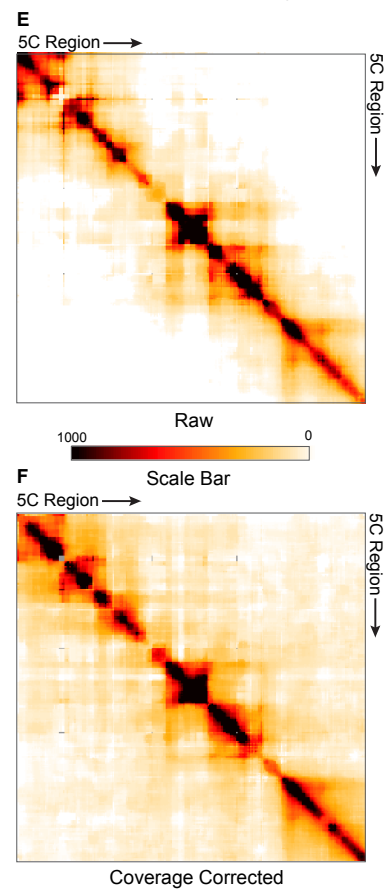

Caco2 R2

Figure S2

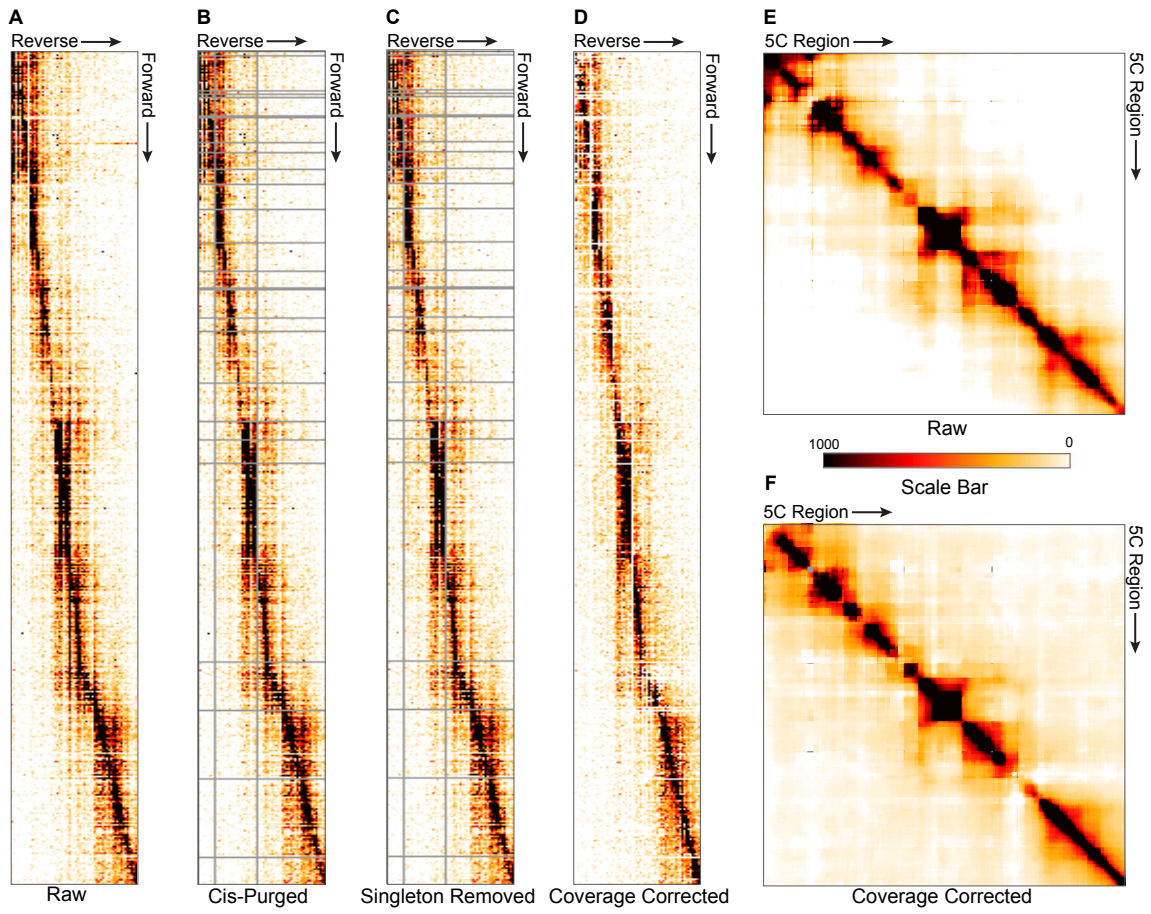

Calu3 R1

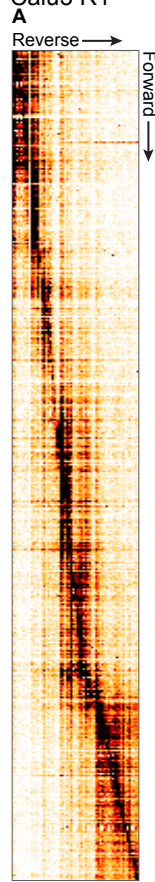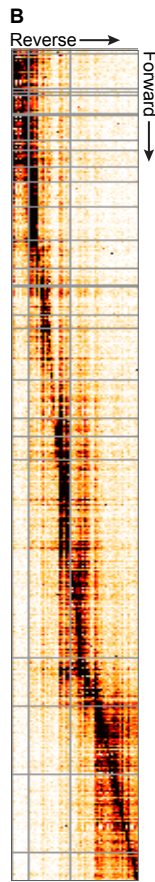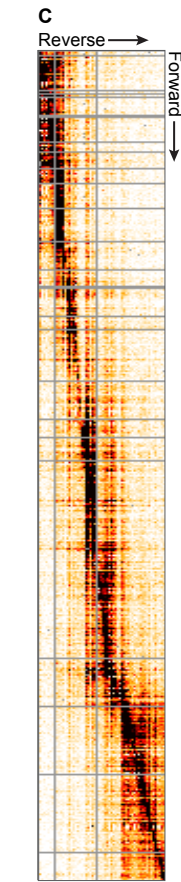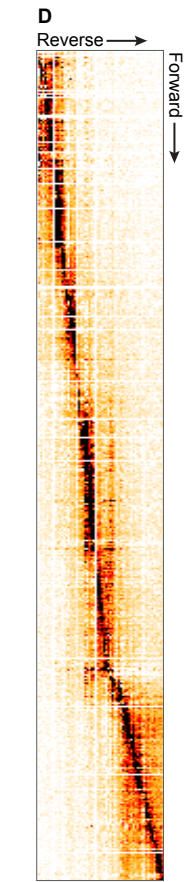

Figure S3

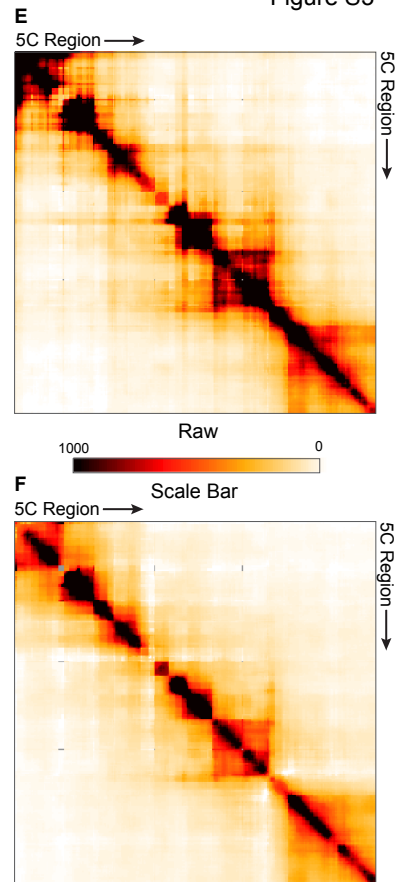

Calu3 R2

Figure S4

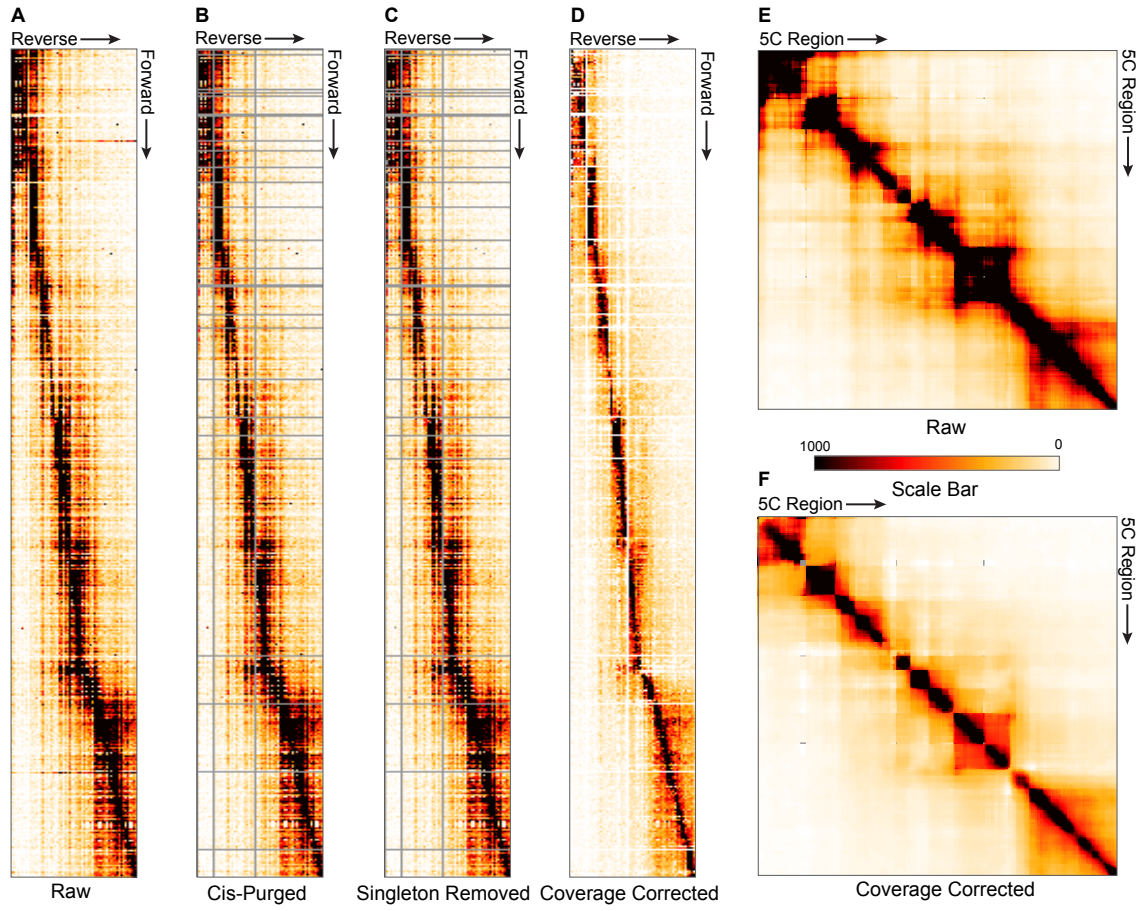



Capan1 R1

Figure S5

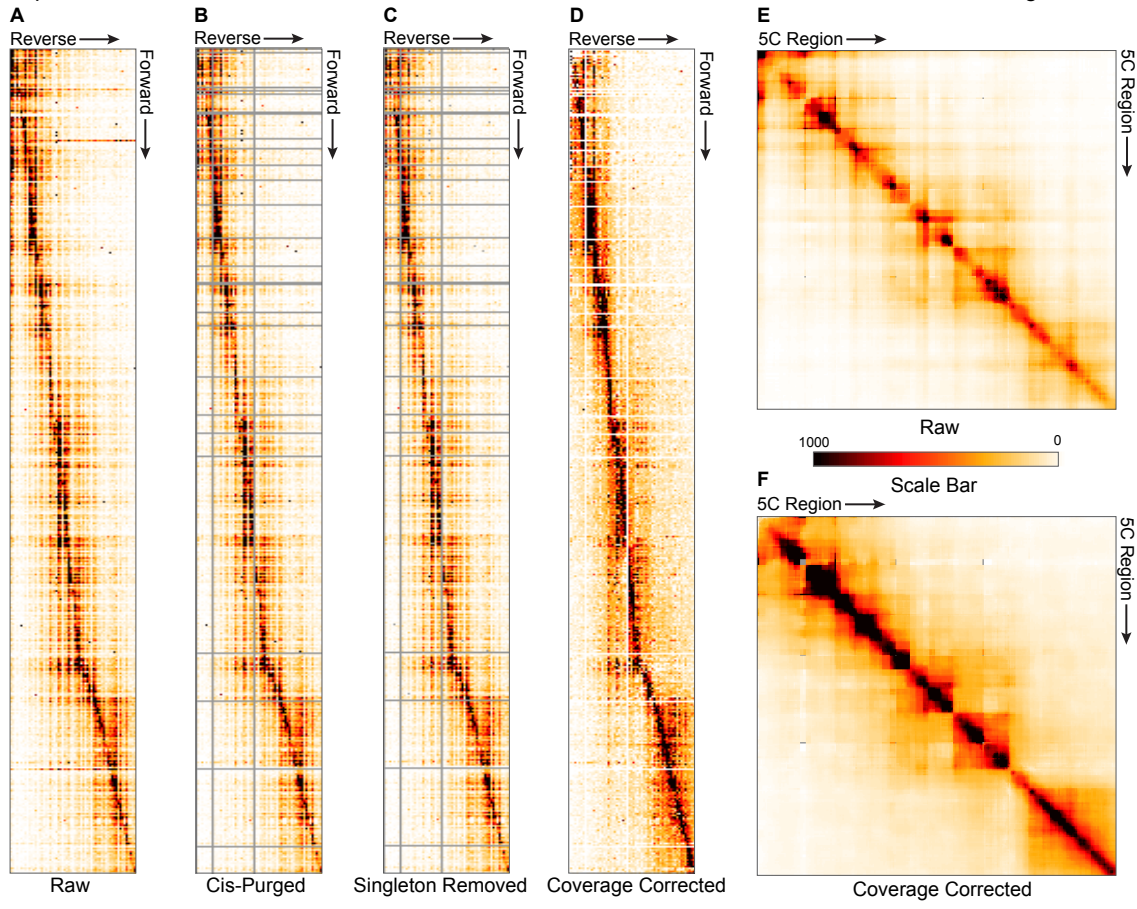

Capan1 R2

Figure S6

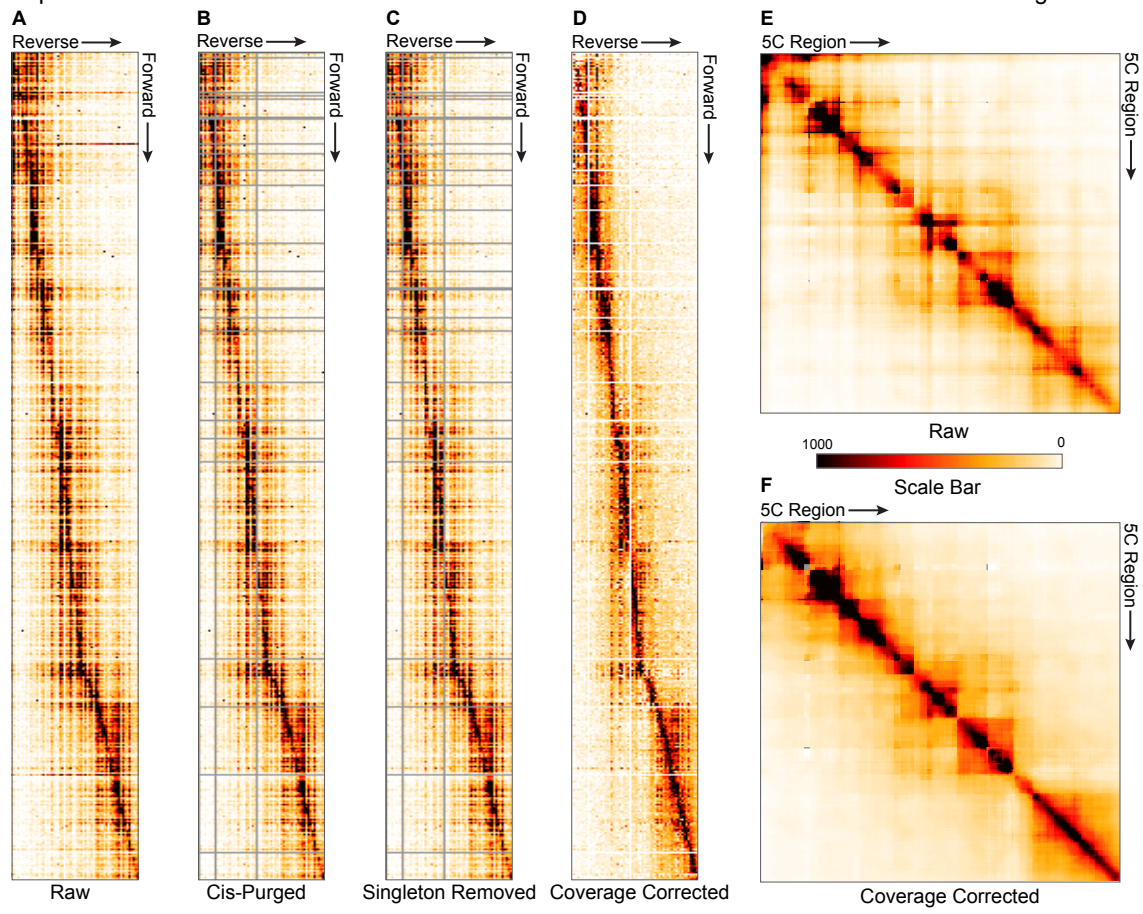

GM12878 R1

Figure S7

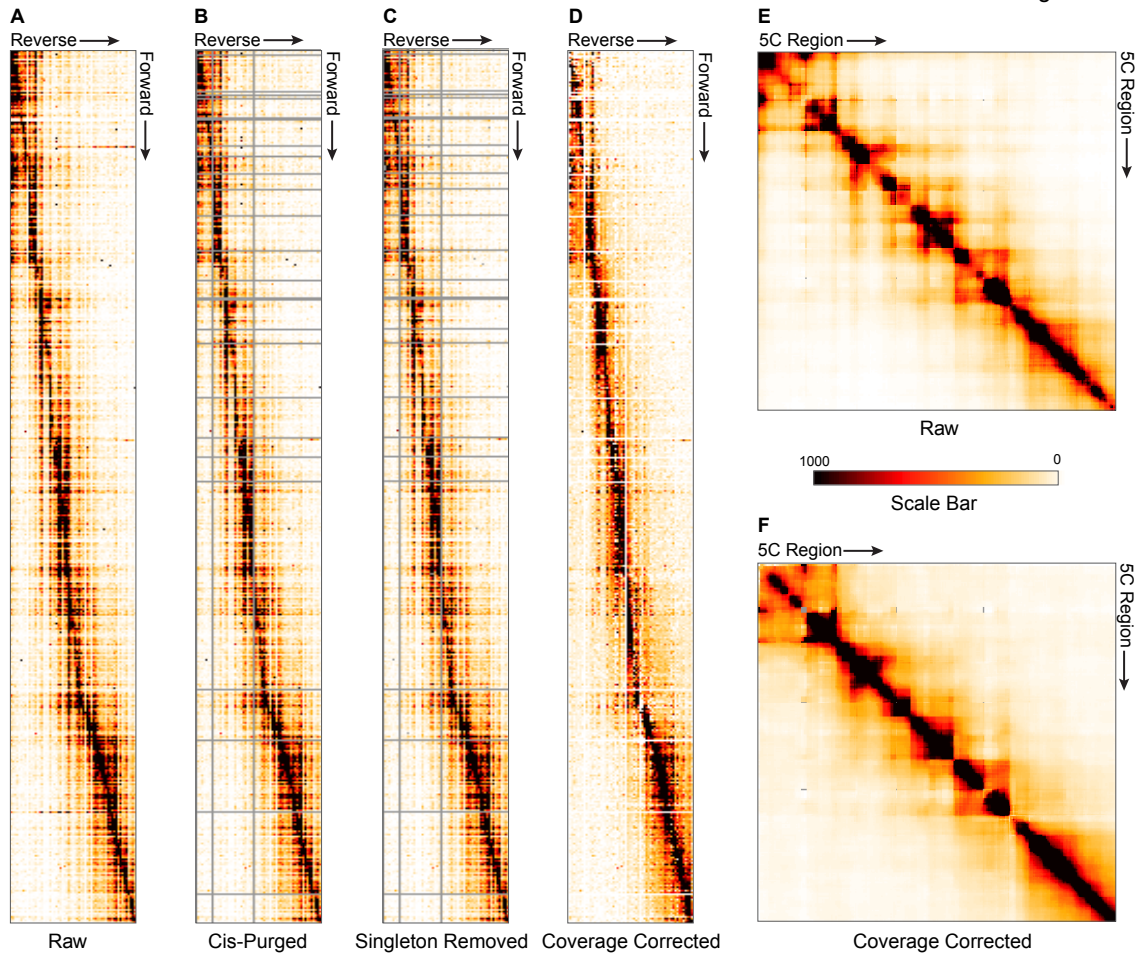

GM12878 R2

Figure S8

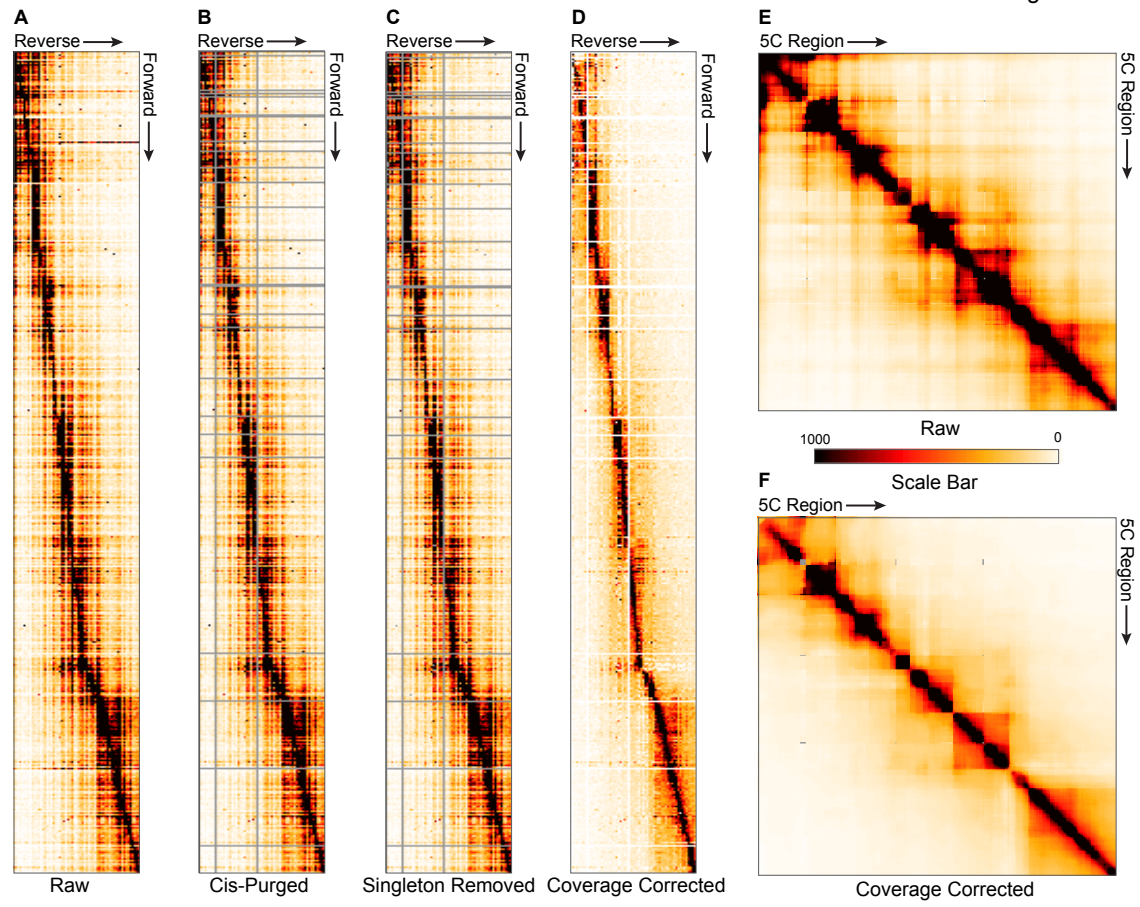

HepG2 R1

Figure S9

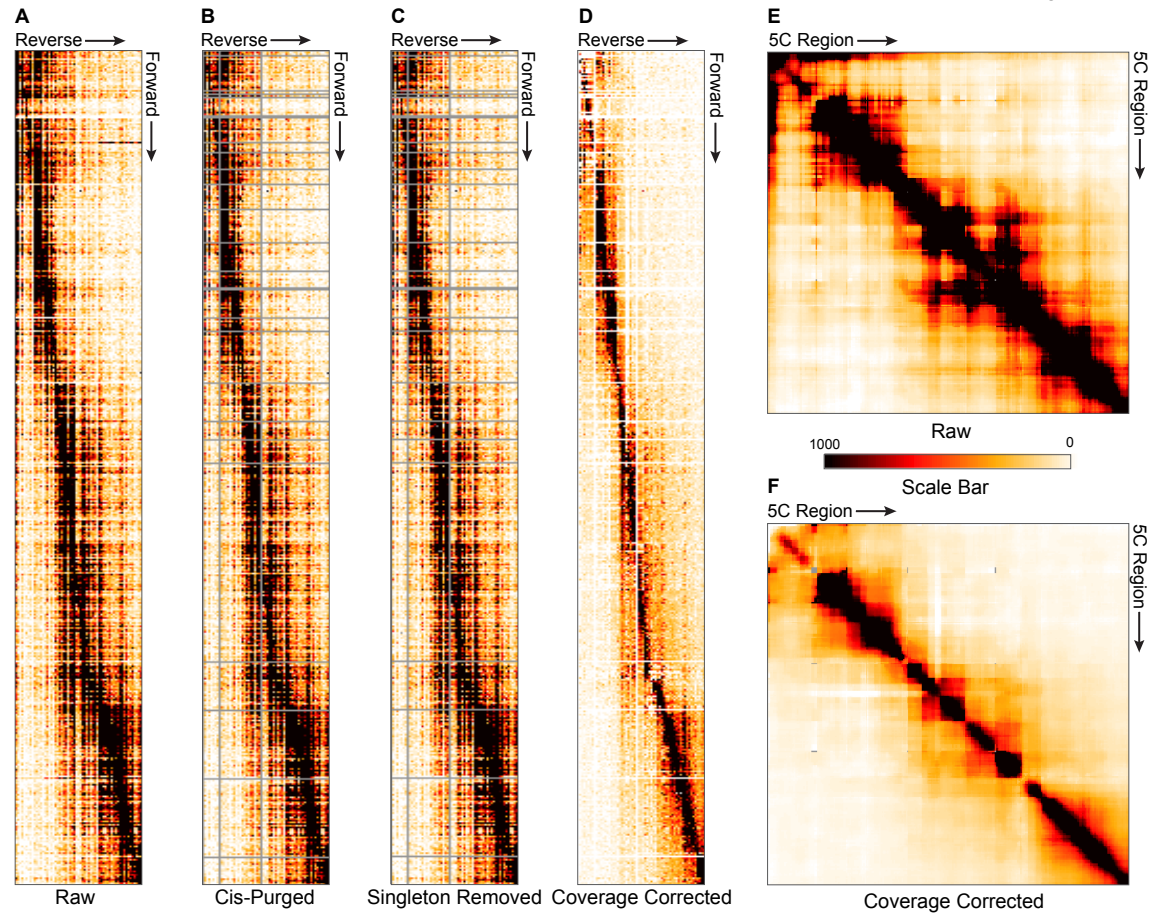

HepG2 R2

Figure S10

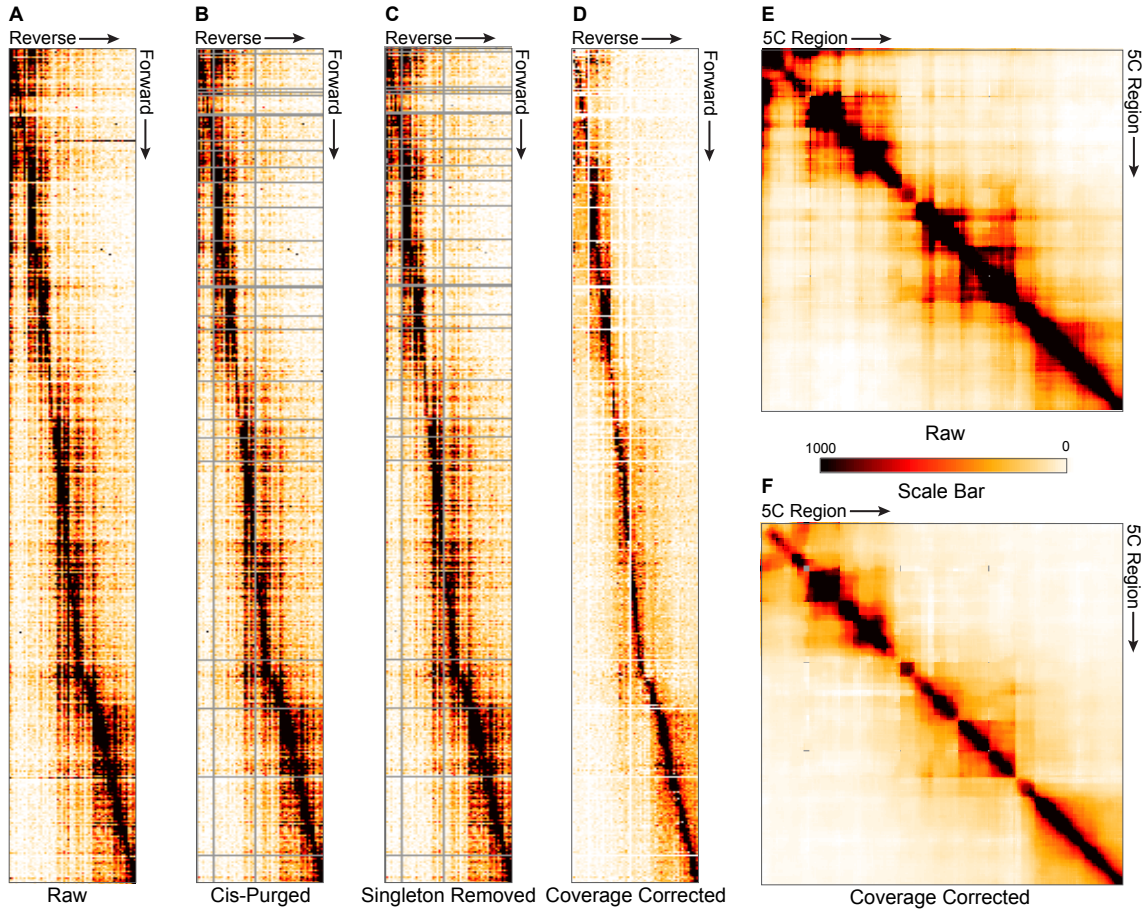

**Figure S11: Insulation Index of all cell lines and different window search spaces, and correlation with CTCF binding**

A) The insulation index method is illustrated by sliding a diamond along the bottom of the triangular heatmap. Interactions within the diamond are summed and divided by the average sum for the region to calculate the insulation score of the bin at the bottom corner of the diamond. Below the heatmap is plotted the insulation index for all cell lines and the average, as in **Figure 2**. The size of the window over which can be changed, but does not affect the insulation profile (panel C).

B) A) Insulation profiles run on the combined heatmap (all 10 datasets) using different diamond (window) sizes. As the size increases the index smoothens out but maintains the same peaks and minima. B). Browser shot (hg18) of the 2.8 Mb region studied here with the positions of the 7 TAD indicated (Top track, in black bars). Below are CTCF ChIP seq tracks (CTCF P = peaks, CTCF s= raw signal) for GM12878 and HepG2 cells. CTCF sites are within 10-20 Kb of TAD boundaries but are also found inside TADs. Also indicated are positions of all genes (UCSC gene track). CTCF ChIP- seq data were generated at the Broad Institute and in the lab of Dr. Bradley Bernstein at Massachusetts General Hospital/Harvard Medical School. This data is publicly available as part of the ENCODE dataset. B) Pearson correlations between the insulation profiles for the different cell types studies here. C) Pearson correlation of insulation profiles for the combined dataset calculated with the different diamond sizes.

Figure S11

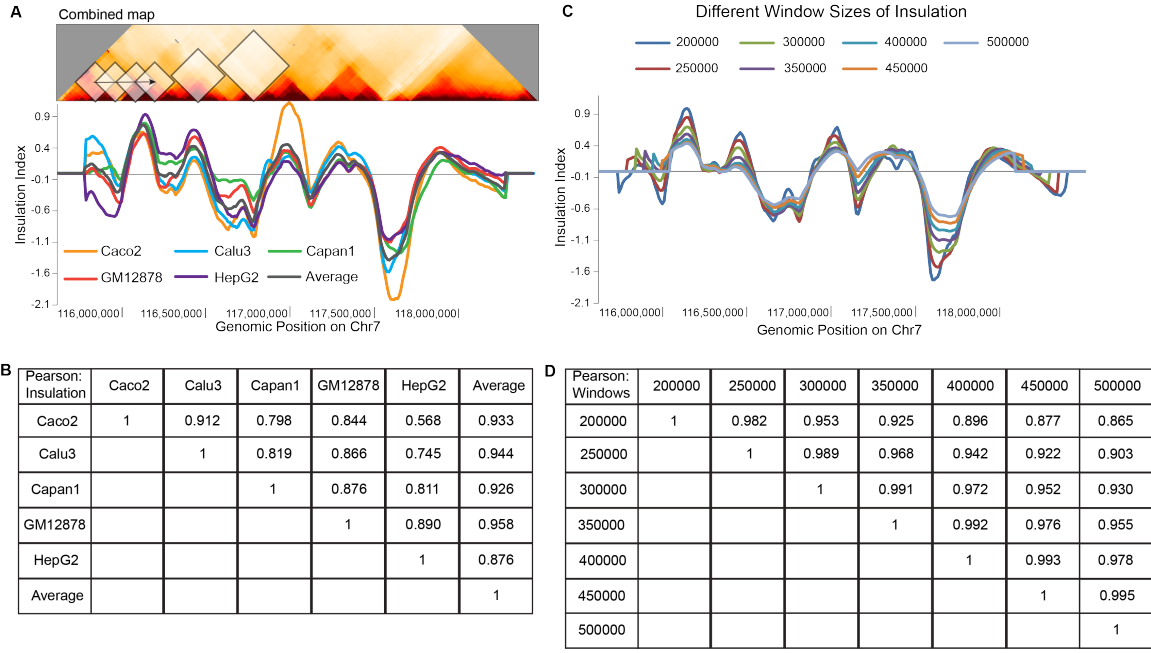



**Figure S12: Scaling plots for all cell lines, interactions and peaks.** For all plots: red represents inter-TAD interactions, blue intra-TAD interactions, and green all interactions. A) Scaling plot of all interactions for Caco2 cells. B) Scaling plot of all interactions for Calu3 cells C) Scaling plot of all interactions for Capan1 cells. D) C) Scaling plot of all interactions for GM12878 cells. E) D) Scaling plot of all interactions for HepG2 cells. F) E) Scaling plot of peaks significant interactions in Caco2 cells. G) F) Scaling plot of significant interactions in Capan1 cells. H) G) Scaling plot of significant interactions in Calu3 cells. H). I) Scaling plots of significant interactions in GM12878 cells. J) H) Scaling plots of significant interactions in HepG2 cells.

Figure S12

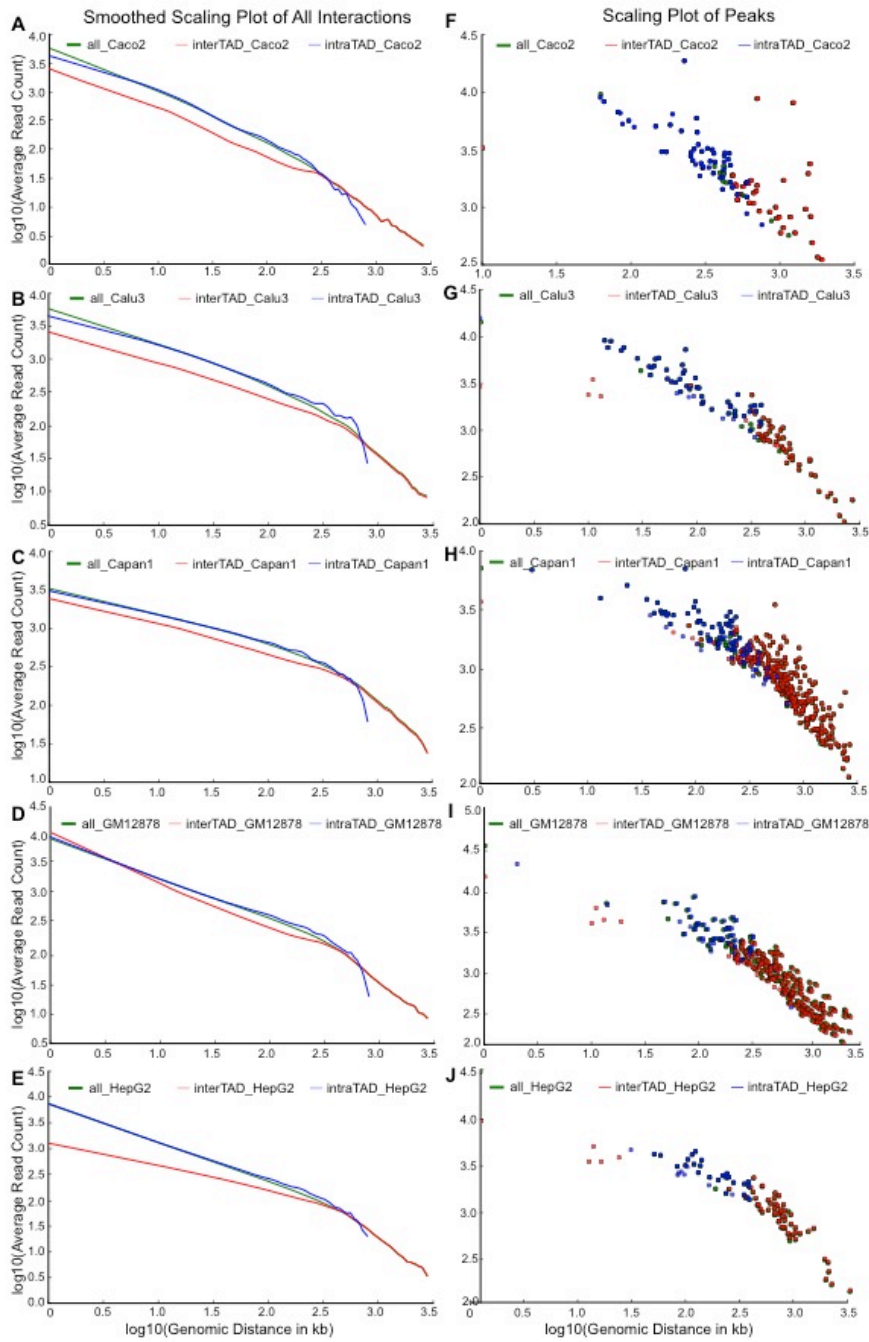

**Figure S13: Interactions deemed significant in only one replicate have higher signal in the other replicate as compared to interactions deemed not significant in both replicates.** For all plots: The box plot on the far left represents z-scores for interactions called significant in both replicates. The blue box plot of peaks in replicate 1 represents those interactions in replicate 1 that were deemed significant, but were not significant in replicate 2. The green box shows the z-scores of those same interactions in the second replicate, where they were not counted significant. This coloring is reversed when we look at replicate 2. The blue box now indicates the z-score of interactions deemed significant in replicate 2 but not in replicate 1. The green box shows the z-scores of those same interactions in replicate 1, where they are not significant. The box plot on the far right shows the z-scores of all interactions in both replicates that were not significant. This is the same for all graphs.

Figure S13

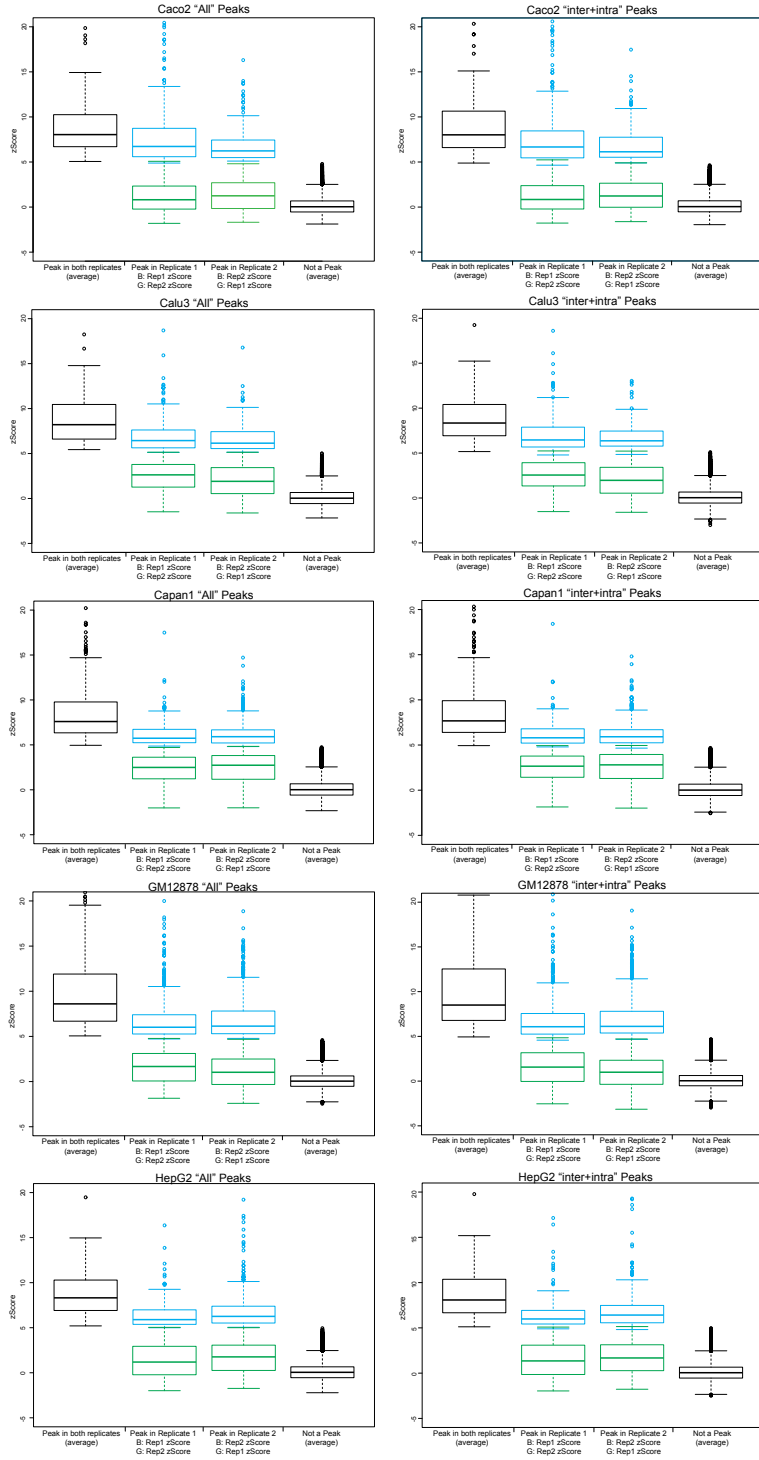

**Figure S14: Overlap of peak calling between replicates on the whole data set.**

Overlap of significant interactions in Caco2 replicates (A), Calu3 replicates (B), Capan1 replicates (C), GM12878 replicates (D) and HepG2 replicates (E).

Figure S14

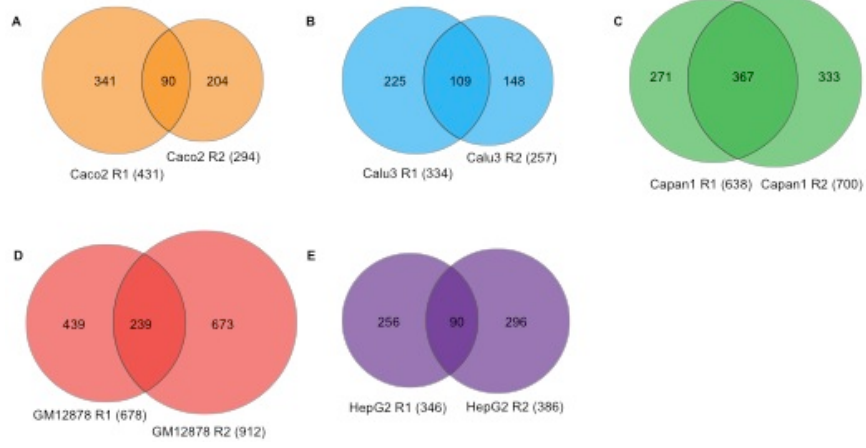

**Figure S15: Overlap of peak calling between replicates on the intraTAD dataset.**

Overlap of significant interactions in Caco2 replicates (A), Calu3 replicates (B), Capan1 replicates (C), GM12878 replicates (D) and HepG2 replicates (E).

Figure S15

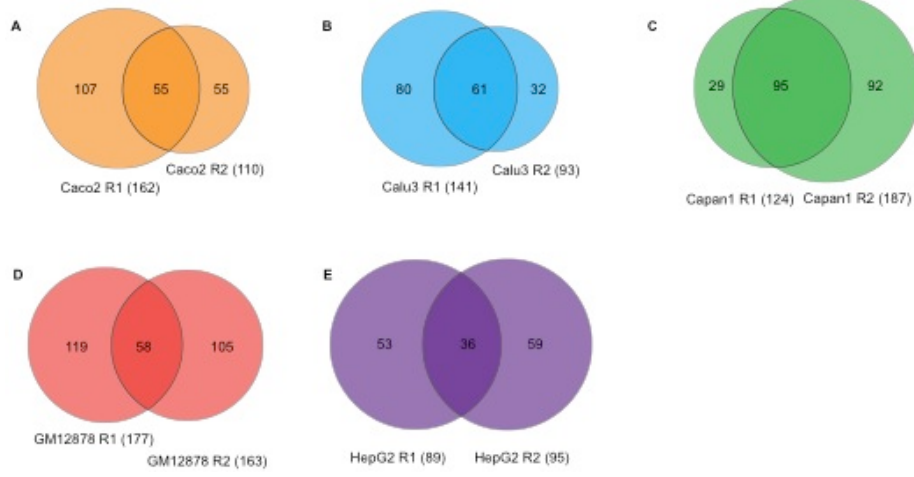



**Figure S16: Overlap of peak calling between replicates on the interTAD dataset.**

Overlap of significant interactions in Caco2 replicates (A), Calu3 replicates (B), Capan1 replicates (C), GM12878 replicates (D) and HepG2 replicates (E).

Figure S16

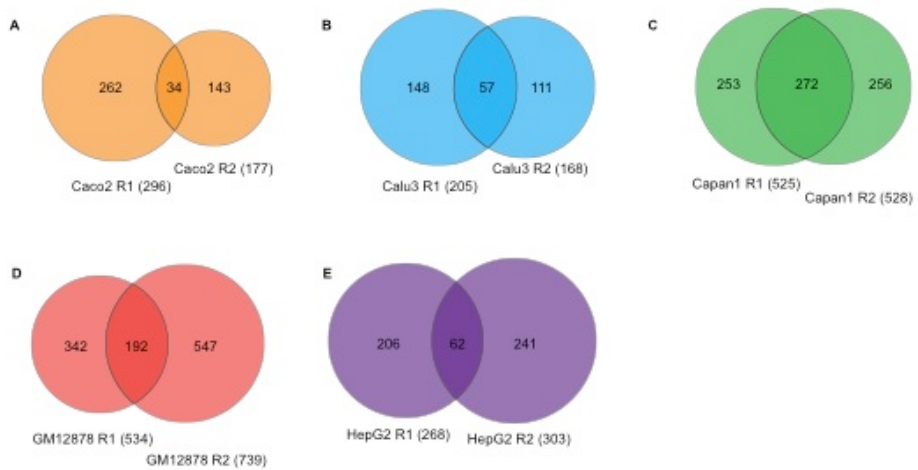

**Figure S17: Overlap of peaks called using the different spaces: whole, intra-TAD and inter-TAD, for all cell lines.** A) Overlap of peak calling methods in Caco2 cells. B) Overlap of peak calling methods in Calu3 cells. C) Overlap of peak calling methods in Capan1 cells. D) Overlap of peak calling methods in GM12878 cells. E) Overlap of peak calling methods in HepG2 cells. F) Diagram of peak calling space (same as Figure 4A).

Figure S17

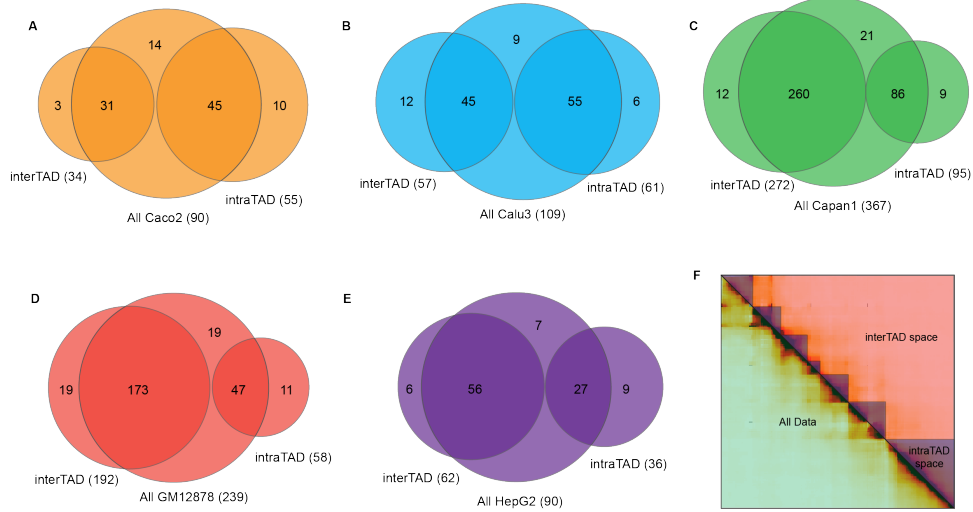

**Figure S18: Significant interactions of the *CAV2* promoter.** A genome browser snapshot of the region is above each profile view. In each anchor plot: Corrected read count is plotted versus genomic distance. The yellow bar represents the location of the anchoring interaction. The dotted black lines represent the loess standard deviation, and the thick black line represents the loess average. The red line represents the interactions of the genomic fragment indicated by the yellow line with all other interrogated fragments in the region. Significant interactions are indicated by large circles.

Figure S18

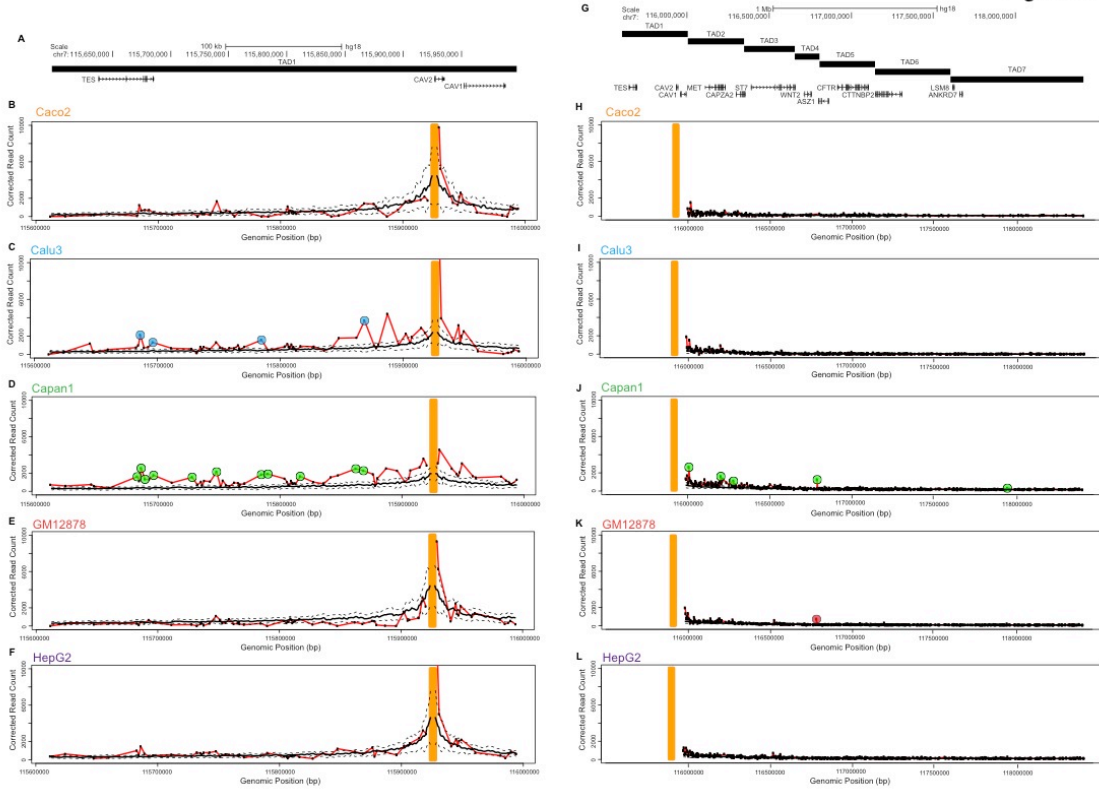

**Figure S19: Significant interactions of *MET* and *CAPZA2* promoters.** A genome browser snapshot of the region is above each profile view. In each anchor plot: Corrected read count is plotted versus genomic distance. The yellow bar represents the location of the anchoring interaction. The dotted black lines represent the loess standard deviation, and the thick black line represents the loess average. The red line represents the interactions of the genomic fragment indicated by the yellow line with all other interrogated fragments in the region. Significant interactions are indicated by large circles.

Figure S19

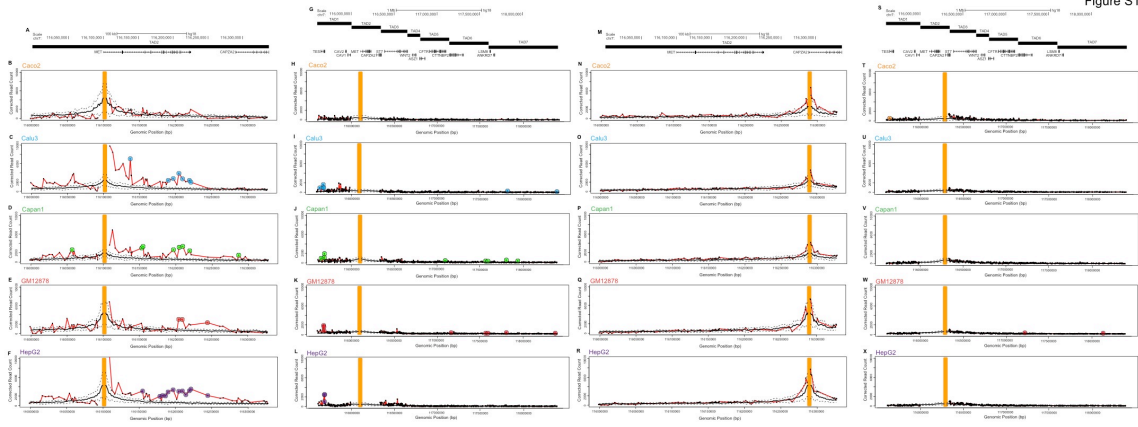



**Figure S20: Significant interactions of the *ST7* promoter.** A genome browser snapshot of the region is above each profile view. In each anchor plot: Corrected read count is plotted versus genomic distance. The yellow bar represents the location of the anchoring interaction. The dotted black lines represent the loess standard deviation, and the thick black line represents the loess average. The red line represents the interactions of the genomic fragment indicated by the yellow line with all other interrogated fragments in the region. Significant interactions are indicated by large circles.

Figure S20

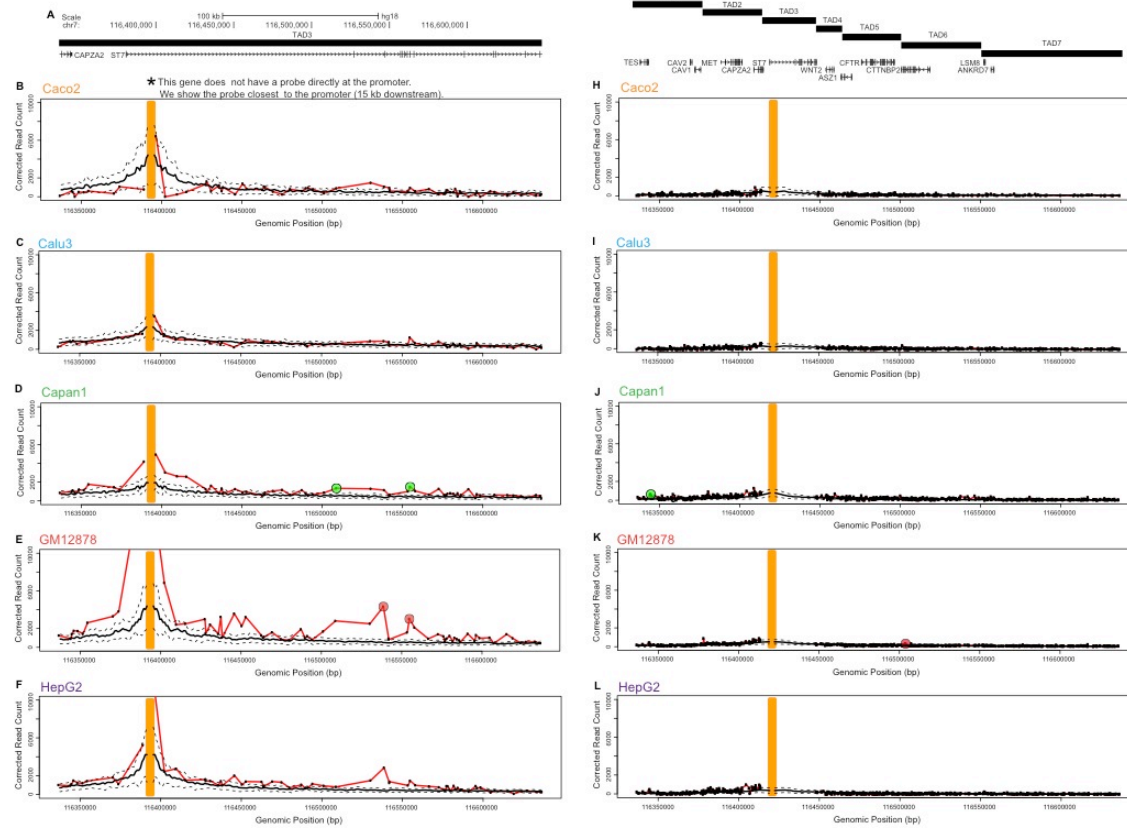

**Figure S21: Significant interactions of the *WNT2* promoter.** A genome browser snapshot of the region is above each profile view. In each anchor plot: Corrected read count is plotted versus genomic distance. The yellow bar represents the location of the anchoring interaction. The dotted black lines represent the loess standard deviation, and the thick black line represents the loess average. The red line represents the interactions of the genomic fragment indicated by the yellow line with all other interrogated fragments in the region. Significant interactions are indicated by large circles.

Figure S21

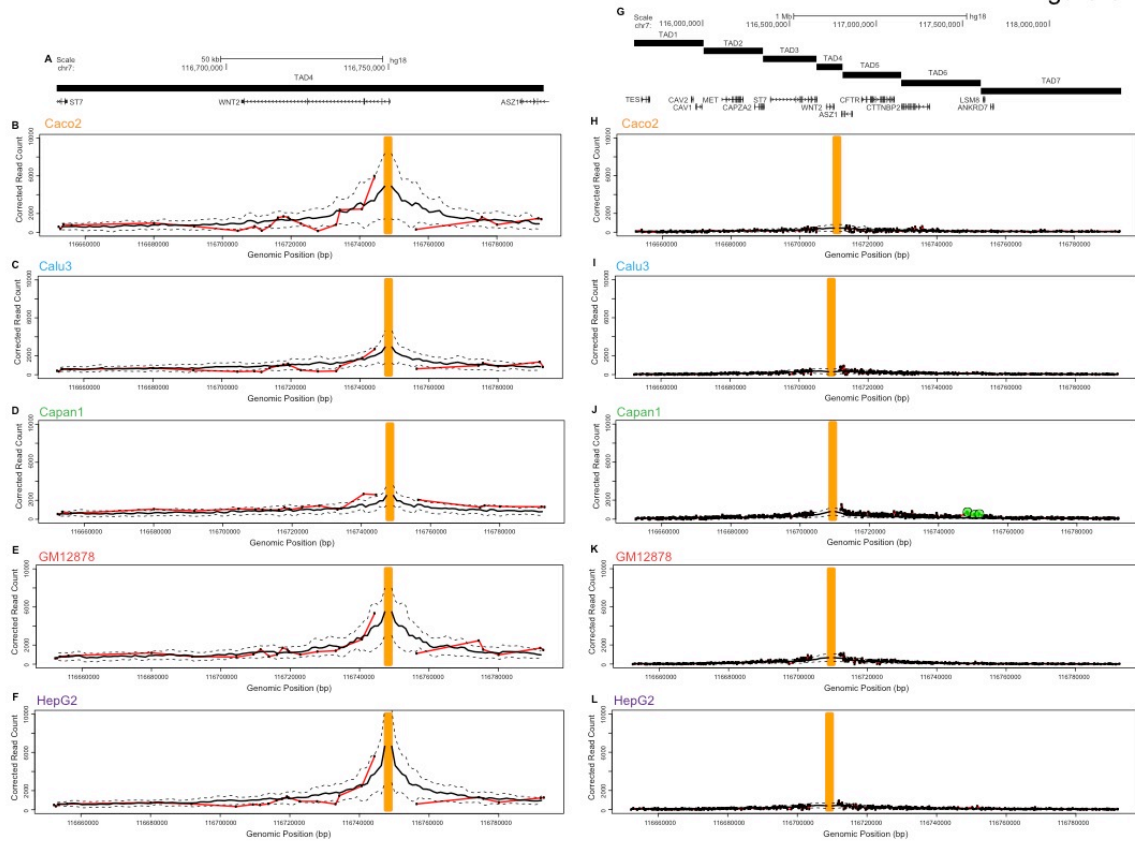

**Figure S22: Significant interactions of *ASZ1* and *CFTR* promoters.** A genome browser snapshot of the region is above each profile view. In each anchor plot: Corrected read count is plotted versus genomic distance. The yellow bar represents the location of the anchoring interaction. The dotted black lines represent the loess standard deviation, and the thick black line represents the loess average. The red line represents the interactions of the genomic fragment indicated by the yellow line with all other interrogated fragments in the region. Significant interactions are indicated by large circles.

Figure S22

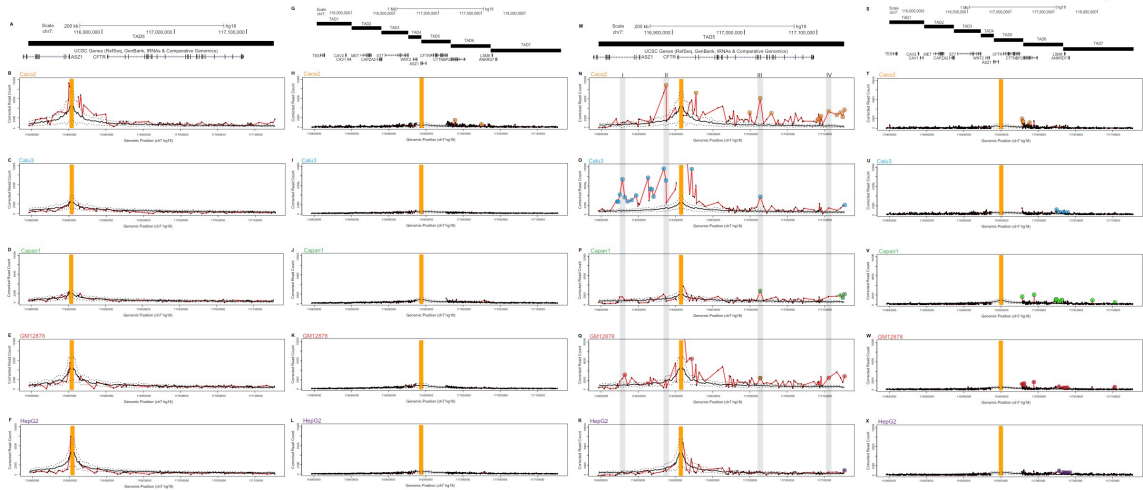

**Figure S23: Significant interactions of the *CTTNBP2* promoter within TAD6.**

A genome browser snapshot of the region is above each profile view. In each anchor plot: Corrected read count is plotted versus genomic distance. The yellow bar represents the location of the anchoring interaction. The dotted black lines represent the loess standard deviation, and the thick black line represents the loess average. The red line represents the interactions of the genomic fragment indicated by the yellow line with all other interrogated fragments in the region. Significant interactions are indicated by large circles.

Figure S23

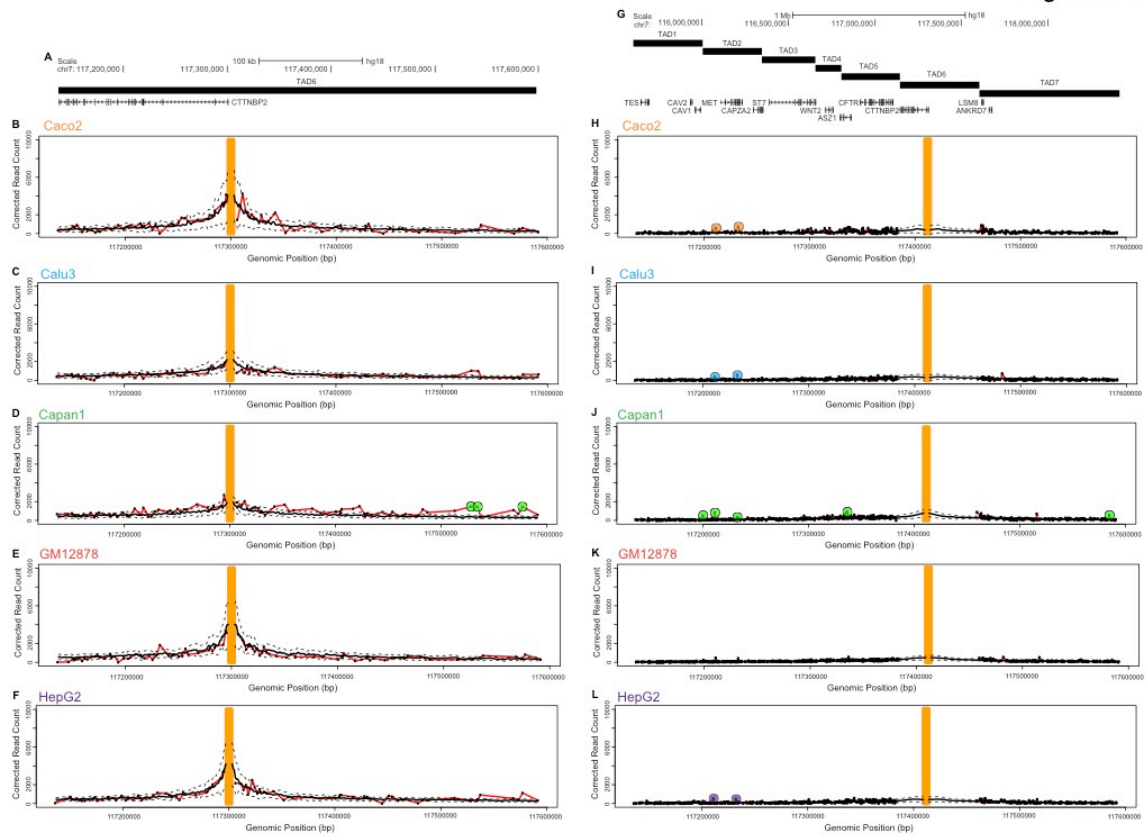



**Figure S24: Significant interactions of the *LSM8* and Ankyrin Repeat Domain- containing Protein 7 (*ANKRD7* [MIM 610731]) promoters.** A genome browser snapshot of the region is above each profile view. In each anchor plot: Corrected read count is plotted versus genomic distance. The yellow bar represents the location of the anchoring interaction. The dotted black lines represent the loess standard deviation, and the thick black line represents the loess average. The red line represents the interactions of the genomic fragment indicated by the yellow line with all other interrogated fragments in the region. Significant interactions are indicated by large circles.

Figure S24

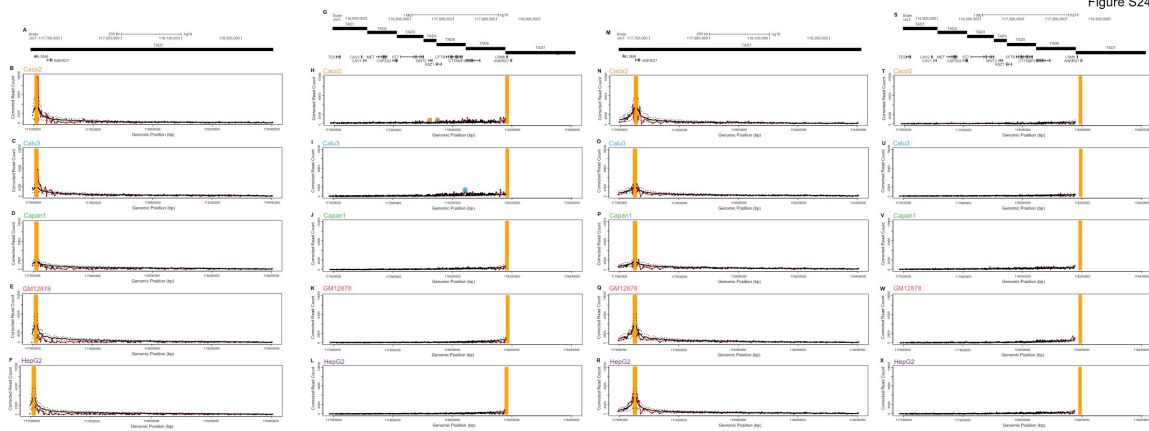

Supplement: mmc1.pdf [file mmc1.pdf]
